# Supplementary material for: Genome sequencing of evolved aspergilli populations reveals robust genomes, transversions in A. flavus, and sexual aberrancy in non-homologous end-joining mutants
Source: Springer Nature journal article supplement (doi:10.1186/s12915-019-0702-0), 2019-11-11

**a** *A. fumigatus*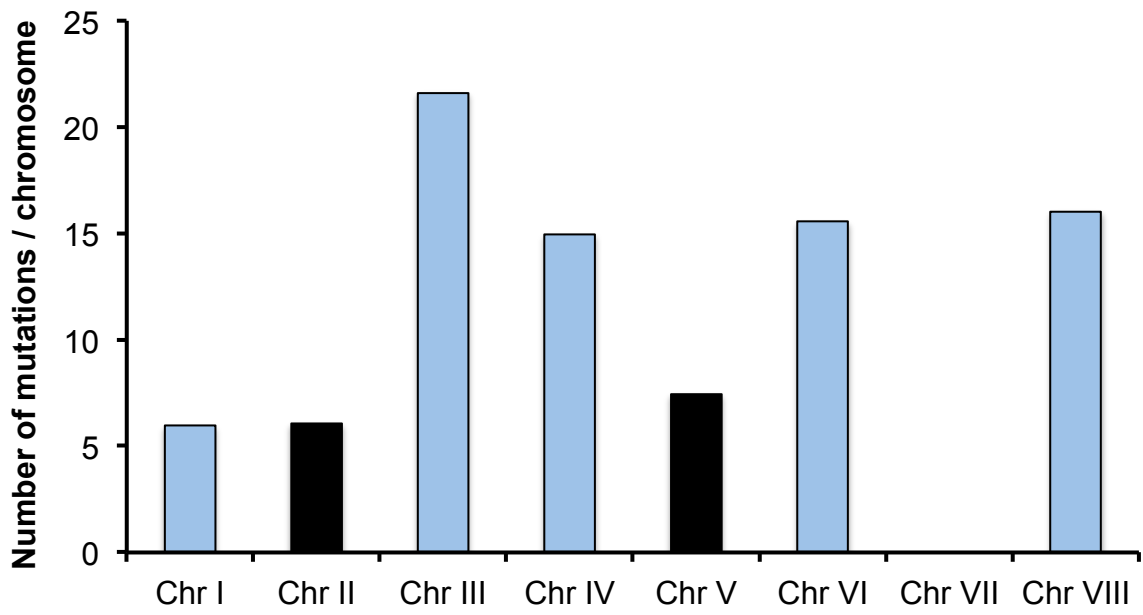**b** *A. nidulans*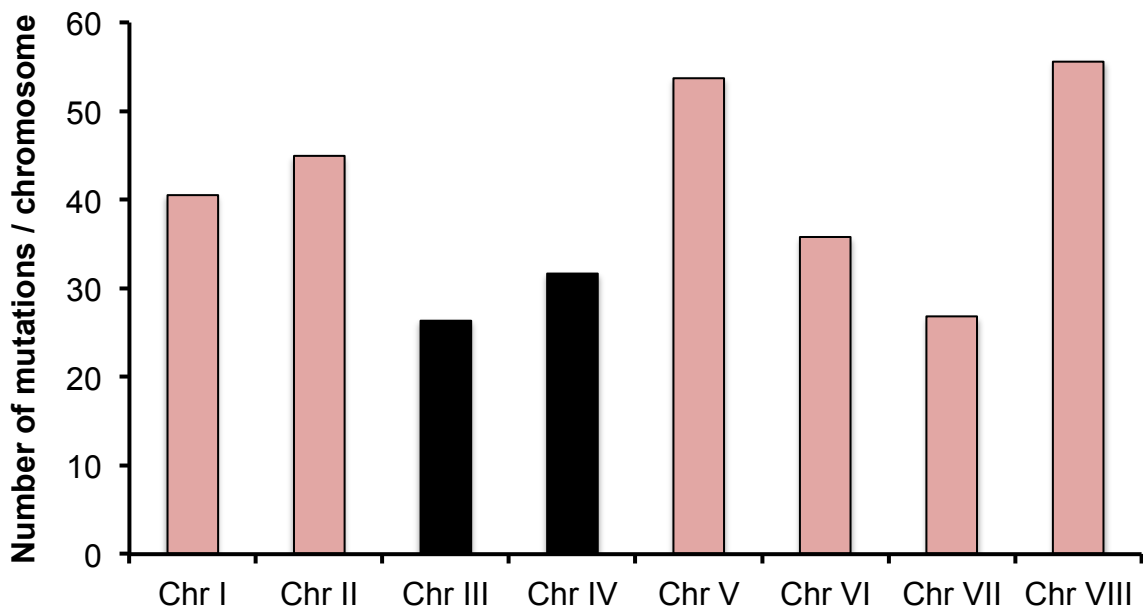

Supplement: MOESM2 [file 12915_2019_702_MOESM2_ESM.pdf]
