# Supplementary material for: Genome sequencing of evolved aspergilli populations reveals robust genomes, transversions in A. flavus, and sexual aberrancy in non-homologous end-joining mutants
Source: Springer Nature journal article supplement (doi:10.1186/s12915-019-0702-0), 2019-11-11
Supplement: MOESM5 [file 12915_2019_702_MOESM5_ESM.pdf]

| STRAIN AND CONTIG      | POSITION | MA LINE | PROTEIN ID | REF | ALT | GENE        | ANOTATION                                                                                                                                                                   |
|------------------------|----------|---------|------------|-----|-----|-------------|-----------------------------------------------------------------------------------------------------------------------------------------------------------------------------|
| <b>A. flavus WT</b>    |          |         |            |     |     |             |                                                                                                                                                                             |
| A_flavus_1041045517025 | 1822808  | WT60-1  | 34471      | T   | C   | AFL2T_00651 | Protein of unknown function                                                                                                                                                 |
| A_flavus_1041045517025 | 2777779  | WT60-1  | INTERGENIC | G   | C   |             |                                                                                                                                                                             |
| A_flavus_1041045517025 | 3622468  | WT60-1  | 35071      | C   | A   | AFL2T_01251 | Has domain(s) with predicted role in transmembrane transport and integral to membrane localization                                                                          |
| A_flavus_1041045517009 | 824036   | WT60-1  | INTERGENIC | AT  | A   |             |                                                                                                                                                                             |
| A_flavus_1041045517023 | 1620188  | WT60-1  | 33010      | G   | C   | AFL2T_04441 | Protein of unknown function                                                                                                                                                 |
| A_flavus_1041045517014 | 1422303  | WT60-1  | INTERGENIC | G   | A   |             |                                                                                                                                                                             |
| A_flavus_1041045517021 | 1925828  | WT60-1  | INTERGENIC | C   | A   |             |                                                                                                                                                                             |
| A_flavus_1041045517027 | 424961   | WT60-1  | 36148      | G   | A   | AFL2T_06616 | Protein of unknown function                                                                                                                                                 |
| A_flavus_1041045517026 | 1342483  | WT60-1  | 35806      | G   | T   | AFL2T_09826 |                                                                                                                                                                             |
| A_flavus_1041045517028 | 58445    | WT60-1  | INTERGENIC | G   | A   |             |                                                                                                                                                                             |
| A_flavus_1041045517011 | 1706543  | WT60-1  | INTERGENIC | A   | AAC |             |                                                                                                                                                                             |
| A_flavus_1041045517022 | 336328   | WT60-1  | 31925      | G   | T   | AFL2T_11385 |                                                                                                                                                                             |
| A_flavus_1041045517024 | 87669    | WT60-1  | INTERGENIC | C   | A   |             |                                                                                                                                                                             |
| A_flavus_1041045517012 | 234199   | WT60-2  | INTERGENIC | C   | A   |             |                                                                                                                                                                             |
| A_flavus_1041045517009 | 300977   | WT60-2  | 26539      | G   | C   | AFL2T_03043 |                                                                                                                                                                             |
| A_flavus_1041045517027 | 94538    | WT60-2  | 36027      | C   | A   | AFL2T_06495 |                                                                                                                                                                             |
| A_flavus_1041045517027 | 2214797  | WT60-2  | 36995      | G   | T   | AFL2T_10230 | Ortholog(s) have role in cellular iron ion homeostasis and fungal-type vacuole membrane localization                                                                        |
| A_flavus_1041045517026 | 586826   | WT60-2  | 35565      | G   | T   | AFL2T_09585 |                                                                                                                                                                             |
| A_flavus_1041045517012 | 3650023  | WT60-3  | INTERGENIC | A   | G   |             |                                                                                                                                                                             |
| A_flavus_1041045517023 | 2477114  | WT60-3  | 33315      | G   | C   | AFL2T_04746 | Has domain(s) with predicted mismatched DNA binding, ATP binding activity and role in mismatch repair                                                                       |
| A_flavus_1041045517014 | 127731   | WT60-3  | INTERGENIC | G   | T   |             |                                                                                                                                                                             |
| A_flavus_1041045517010 | 253282   | WT60-3  | 27713      | C   | G   | AFL2T_08286 |                                                                                                                                                                             |
| A_flavus_1041045517029 | 1638601  | WT60-3  | 37984      | G   | T   | AFL2T_09264 |                                                                                                                                                                             |
| A_flavus_1041045517028 | 348172   | WT60-3  | 36900      | C   | A   | AFL2T_10135 |                                                                                                                                                                             |
| A_flavus_1041045517023 | 679763   | WT60-4  | 32692      | C   | T   | AFL2T_04123 | Protein of unknown function                                                                                                                                                 |
| A_flavus_1041045517023 | 730255   | WT60-4  | INTERGENIC | C   | A   |             |                                                                                                                                                                             |
| A_flavus_1041045517028 | 1623708  | WT60-4  | 37319      | C   | A   | AFL2T_10554 | Protein of unknown function                                                                                                                                                 |
| A_flavus_1041045517025 | 1425081  | WT60-5  | INTERGENIC | C   | A   |             |                                                                                                                                                                             |
| A_flavus_1041045517012 | 938566   | WT60-5  | 29066      | G   | C   | AFL2T_01864 |                                                                                                                                                                             |
| A_flavus_1041045517014 | 1140416  | WT60-5  | INTERGENIC | G   | C   |             |                                                                                                                                                                             |
| A_flavus_1041045517027 | 2114918  | WT60-5  | 36712      | C   | G   | AFL2T_07180 | Protein of unknown function                                                                                                                                                 |
| A_flavus_1041045517027 | 2336922  | WT60-5  |            | A   | T   |             |                                                                                                                                                                             |
| A_flavus_1041045517026 | 367425   | WT60-5  | 35734      | G   | C   |             |                                                                                                                                                                             |
| A_flavus_1041045517025 | 2767254  | WT60-6  | 35038      | G   | T   | AFL2T_01218 |                                                                                                                                                                             |
| A_flavus_1041045517025 | 2840336  | WT60-6  | INTERGENIC | A   | ATG |             |                                                                                                                                                                             |
| A_flavus_1041045517009 | 1832327  | WT60-6  | 27076      | C   | T   | AFL2T_03580 | Has domain(s) with predicted substrate-specific transmembrane transporter activity, role in transmembrane transport and integral to membrane localization                   |
| A_flavus_1041045517009 | 2603075  | WT60-6  | 27345      | G   | A   | AFL2T_03849 | Has domain(s) with predicted nucleic acid binding, nucleotide binding activity                                                                                              |
| A_flavus_1041045517027 | 1221825  | WT60-6  | 36418      | C   | T   | AFL2T_06886 |                                                                                                                                                                             |
| A_flavus_1041045517028 | 544138   | WT60-6  | 36970      | C   | G   | AFL2T_10205 | Protein of unknown function                                                                                                                                                 |
| A_flavus_1041045517025 | 3187259  | WT60-7  | 34930      | TA  | T   | AFL2T_01110 | Has domain(s) with predicted dihydrolipoyllysine-residue succinyltransferase activity, role in tricarboxylic acid cycle and oxoglutarate dehydrogenase complex localization |
| A_flavus_1041045517012 | 2498620  | WT60-7  | 29587      | C   | A   | AFL2T_02385 | Ortholog(s) have role in cellular calcium ion homeostasis                                                                                                                   |
| A_flavus_1041045517009 | 95700    | WT60-7  | 26470      | G   | C   | AFL2T_02974 |                                                                                                                                                                             |
| A_flavus_1041045517022 | 1114969  | WT60-7  | INTERGENIC | C   | G   |             |                                                                                                                                                                             |
| A_flavus_1041045517022 | 1771086  | WT60-7  | INTERGENIC | C   | G   |             |                                                                                                                                                                             |
| A_flavus_1041045517024 | 1172196  | WT60-7  | 33782      | G   | A   | AFL2T_12317 |                                                                                                                                                                             |
| A_flavus_1041045517007 | 2502     | WT60-7  | 26322      | T   | C   | AFL2T_12475 |                                                                                                                                                                             |
| A_flavus_1041045517025 | 3368573  | WT60-8  | INTERGENIC | GA  | G   |             |                                                                                                                                                                             |
| A_flavus_1041045517012 | 3723286  | WT60-8  | INTERGENIC | G   | T   |             |                                                                                                                                                                             |
| A_flavus_1041045517009 | 558008   | WT60-8  | INTERGENIC | T   | G   |             |                                                                                                                                                                             |

|                        |         |         |            |       |   |   |             |                                                                                                                                                                                            |
|------------------------|---------|---------|------------|-------|---|---|-------------|--------------------------------------------------------------------------------------------------------------------------------------------------------------------------------------------|
| A_flavus_1041045517023 | 1351413 | WT60-8  |            | 32918 | C | A | AFL2T_04349 | Has domain(s) with predicted nucleic acid binding, ATP binding, ATP-dependent helicase activity                                                                                            |
| A_flavus_1041045516891 | 199792  | WT60-8  |            | 25573 | G | A | AFL2T_07324 |                                                                                                                                                                                            |
| A_flavus_1041045517012 | 3588661 | WT60-9  |            | 29966 | G | C | AFL2T_02764 | Protein of unknown function                                                                                                                                                                |
| A_flavus_1041045517009 | 278237  | WT60-9  | INTERGENIC |       | G | T |             |                                                                                                                                                                                            |
| A_flavus_1041045517023 | 1985866 | WT60-9  |            | 33374 | C | A |             |                                                                                                                                                                                            |
| A_flavus_1041045516891 | 461871  | WT60-9  | INTERGENIC |       | C | A |             |                                                                                                                                                                                            |
| A_flavus_1041045517011 | 1073518 | WT60-9  | INTERGENIC |       | G | A |             |                                                                                                                                                                                            |
| A_flavus_1041045517024 | 538065  | WT60-9  |            | 33575 | C | A | AFL2T_12110 | Protein of unknown function                                                                                                                                                                |
| A_flavus_1041045516888 | 4043    | WT60-9  | INTERGENIC |       | C | A |             |                                                                                                                                                                                            |
| A_flavus_1041045517009 | 847121  | WT60-10 |            | 26976 | C | A |             |                                                                                                                                                                                            |
| A_flavus_1041045517009 | 1878203 | WT60-10 |            | 27089 | G | T | AFL2T_03593 | Has domain(s) with predicted ATP binding, ATPase activity, coupled to transmembrane movement of substances activity, role in transmembrane transport and integral to membrane localization |
| A_flavus_1041045517021 | 677404  | WT60-10 |            | 31234 | G | T | AFL2T_05895 | Protein of unknown function                                                                                                                                                                |
| A_flavus_1041045517027 | 187878  | WT60-10 |            | 36055 | A | G | AFL2T_06523 |                                                                                                                                                                                            |
| A_flavus_1041045516891 | 121175  | WT60-10 |            | 25544 | C | A | AFL2T_07295 |                                                                                                                                                                                            |

#### A. flavus $\Delta ku70$

|                        |         |           |            |       |       |   |             |                                                                                                                                                                                                                                                      |
|------------------------|---------|-----------|------------|-------|-------|---|-------------|------------------------------------------------------------------------------------------------------------------------------------------------------------------------------------------------------------------------------------------------------|
| A_flavus_1041045517012 | 3599082 | KU70-60-1 |            | 29972 | G     | A | AFL2T_02770 | Has domain(s) with predicted zinc ion binding activity                                                                                                                                                                                               |
| A_flavus_1041045517027 | 1682934 | KU70-60-1 |            | 36812 | G     | T |             |                                                                                                                                                                                                                                                      |
| A_flavus_1041045517029 | 350917  | KU70-60-1 | INTERGENIC |       | T     | G |             |                                                                                                                                                                                                                                                      |
| A_flavus_1041045517028 | 1610011 | KU70-60-1 |            | 37314 | C     | T | AFL2T_10549 |                                                                                                                                                                                                                                                      |
| A_flavus_1041045517011 | 877126  | KU70-60-1 |            | 28408 | C     | A | AFL2T_10936 | Has domain(s) with predicted oxidoreductase activity and role in oxidation-reduction process                                                                                                                                                         |
| A_flavus_1041045517012 | 320602  | KU70-60-2 | INTERGENIC |       | C     | A |             |                                                                                                                                                                                                                                                      |
| A_flavus_1041045517012 | 2631421 | KU70-60-2 |            | 29634 | C     | G | AFL2T_02432 |                                                                                                                                                                                                                                                      |
| A_flavus_1041045517009 | 345973  | KU70-60-2 |            | 26554 | G     | A | AFL2T_03058 | Ortholog(s) have role in short-chain fatty acid catabolic process, positive regulation of transcription from RNA polymerase II promoter                                                                                                              |
| A_flavus_1041045517009 | 483004  | KU70-60-2 |            | 26608 | G     | C | AFL2T_03112 | Has domain(s) with predicted sequence-specific DNA binding RNA polymerase II transcription factor, zinc ion binding activity, role in regulation of transcription, DNA-dependent and nucleus localization                                            |
| A_flavus_1041045517023 | 375963  | KU70-60-2 |            | 32588 | C     | T | AFL2T_04019 |                                                                                                                                                                                                                                                      |
| A_flavus_1041045517023 | 1002813 | KU70-60-2 | INTERGENIC |       | T     | C |             |                                                                                                                                                                                                                                                      |
| A_flavus_1041045517028 | 1415691 | KU70-60-2 |            | 37488 | C     | A | AFL2T_08768 | Has domain(s) with predicted hydrolase activity                                                                                                                                                                                                      |
| A_flavus_1041045517012 | 1922756 | KU70-60-3 |            | 29636 | C     | A | AFL2T_02434 |                                                                                                                                                                                                                                                      |
| A_flavus_1041045517012 | 3451811 | KU70-60-3 |            | 30158 | C     | A | AFL2T_04828 | Protein of unknown function                                                                                                                                                                                                                          |
| A_flavus_1041045517014 | 401374  | KU70-60-3 | INTERGENIC |       | G     | A |             |                                                                                                                                                                                                                                                      |
| A_flavus_1041045516891 | 829780  | KU70-60-3 |            | 25796 | A     | G | AFL2T_07547 |                                                                                                                                                                                                                                                      |
| A_flavus_1041045517024 | 529740  | KU70-60-3 |            | 33571 | C     | A | AFL2T_12106 |                                                                                                                                                                                                                                                      |
| A_flavus_1041045517012 | 91029   | KU70-60-4 | INTERGENIC |       | G     | T |             |                                                                                                                                                                                                                                                      |
| A_flavus_1041045517023 | 55808   | KU70-60-4 | INTERGENIC |       | AAGAG | T |             |                                                                                                                                                                                                                                                      |
| A_flavus_1041045517014 | 565416  | KU70-60-4 |            | 30566 | G     | T |             |                                                                                                                                                                                                                                                      |
| A_flavus_1041045517014 | 684117  | KU70-60-4 | INTERGENIC |       | T     | A |             |                                                                                                                                                                                                                                                      |
| A_flavus_1041045517026 | 1156937 | KU70-60-4 |            | 35989 | G     | T | AFL2T_10009 | Protein of unknown function                                                                                                                                                                                                                          |
| A_flavus_1041045517028 | 1561319 | KU70-60-4 |            | 37296 | C     | A | AFL2T_10531 | Protein of unknown function                                                                                                                                                                                                                          |
| A_flavus_1041045517022 | 21141   | KU70-60-4 |            | 31816 | TACC  | T | AFL2T_11276 |                                                                                                                                                                                                                                                      |
| A_flavus_1041045517022 | 944397  | KU70-60-4 |            | 32152 | C     | A | AFL2T_11612 | Has domain(s) with predicted 6-phosphofructokinase activity, role in glycolysis, fructose 6-phosphate metabolic process and 6-phosphofructokinase complex localization                                                                               |
| A_flavus_1041045517024 | 487207  | KU70-60-4 | INTERGENIC |       | G     | C |             |                                                                                                                                                                                                                                                      |
| A_flavus_1041045517008 | 151341  | KU70-60-4 |            | 26369 | G     | T | AFL2T_12402 | Has domain(s) with predicted monooxygenase, iron ion binding, electron carrier, heme binding, oxidoreductase activity, acting on paired donors, with incorporation or reduction of molecular oxygen activity and role in oxidation-reduction process |
| A_flavus_1041045517025 | 3167201 | KU70-60-5 |            | 35165 | G     | T | AFL2T_01345 |                                                                                                                                                                                                                                                      |
| A_flavus_1041045517014 | 2054988 | KU70-60-5 |            | 30835 | A     | C | AFL2T_05505 | Has domain(s) with predicted ammonia-lyase activity, role in L-phenylalanine catabolic process, biosynthetic process and cytoplasm localization                                                                                                      |
| A_flavus_1041045517021 | 1010968 | KU70-60-5 | INTERGENIC |       | C     | G |             |                                                                                                                                                                                                                                                      |
| A_flavus_1041045517010 | 228027  | KU70-60-5 |            | 27463 | C     | A | AFL2T_08036 |                                                                                                                                                                                                                                                      |

|                        |         |            |            |        |      |        |                                                                                                                                                                                                        |
|------------------------|---------|------------|------------|--------|------|--------|--------------------------------------------------------------------------------------------------------------------------------------------------------------------------------------------------------|
| A_flavus_1041045517029 | 947132  | KU70-60-5  | INTERGENIC | G      | C    |        |                                                                                                                                                                                                        |
| A_flavus_1041045517029 | 1610886 | KU70-60-5  |            | 37972  | T    | TGCTAC | AFL2T_09252                                                                                                                                                                                            |
| A_flavus_1041045517022 | 310569  | KU70-60-5  |            | 32158  | G    | A      | AFL2T_11618                                                                                                                                                                                            |
| A_flavus_1041045517009 | 222145  | KU70-60-6  |            | 26511  | G    | A      | AFL2T_03015                                                                                                                                                                                            |
| A_flavus_1041045517023 | 603924  | KU70-60-6  | INTERGENIC | C      | A    |        |                                                                                                                                                                                                        |
| A_flavus_1041045517014 | 2161421 | KU70-60-6  | INTERGENIC | TTATCT | T    |        |                                                                                                                                                                                                        |
| A_flavus_1041045517027 | 1856902 | KU70-60-6  |            | 36620  | C    | T      | AFL2T_07088                                                                                                                                                                                            |
| A_flavus_1041045517010 | 353040  | KU70-60-6  |            | 27513  | G    | T      | AFL2T_08086                                                                                                                                                                                            |
| A_flavus_1041045517029 | 553424  | KU70-60-6  | INTERGENIC | G      | A    |        |                                                                                                                                                                                                        |
| A_flavus_1041045517029 | 1381550 | KU70-60-6  | INTERGENIC | C      | G    |        |                                                                                                                                                                                                        |
| A_flavus_1041045517026 | 115162  | KU70-60-6  | INTERGENIC | G      | C    |        |                                                                                                                                                                                                        |
| A_flavus_1041045517011 | 1315663 | KU70-60-6  |            | 28569  | G    | A      | AFL2T_11097                                                                                                                                                                                            |
| A_flavus_1041045517022 | 1092464 | KU70-60-6  |            | 32202  | G    | T      | AFL2T_11662                                                                                                                                                                                            |
| A_flavus_1041045517022 | 1483554 | KU70-60-6  |            | 32347  | G    | T      | AFL2T_11807                                                                                                                                                                                            |
| A_flavus_1041045517008 | 152760  | KU70-60-6  | INTERGENIC | A      | ACTC |        |                                                                                                                                                                                                        |
| A_flavus_1041045517025 | 2063049 | KU70-60-7  |            | 34548  | G    | A      | AFL2T_00728                                                                                                                                                                                            |
| A_flavus_1041045517012 | 4066248 | KU70-60-7  | INTERGENIC | T      | TTC  |        |                                                                                                                                                                                                        |
| A_flavus_1041045517021 | 1403758 | KU70-60-7  | INTERGENIC | C      | G    |        |                                                                                                                                                                                                        |
| A_flavus_1041045516891 | 276341  | KU70-60-7  | INTERGENIC | C      | G    |        |                                                                                                                                                                                                        |
| A_flavus_1041045517010 | 1356580 | KU70-60-7  |            | 28092  | G    | A      | AFL2T_08665                                                                                                                                                                                            |
| A_flavus_1041045517029 | 13644   | KU70-60-7  |            | 37404  | T    | C      | AFL2T_08684                                                                                                                                                                                            |
| A_flavus_1041045517029 | 1908930 | KU70-60-7  |            | 38065  | T    | G      | AFL2T_09345                                                                                                                                                                                            |
| A_flavus_1041045517026 | 879488  | KU70-60-7  |            | 35662  | G    | GA     | AFL2T_09682                                                                                                                                                                                            |
| A_flavus_1041045517011 | 601178  | KU70-60-7  | INTERGENIC | T      | TTG  |        |                                                                                                                                                                                                        |
| A_flavus_1041045517025 | 2673467 | KU70-60-8  |            | 34762  | G    | T      | AFL2T_00942                                                                                                                                                                                            |
| A_flavus_1041045517023 | 765092  | KU70-60-8  | INTERGENIC | G      | T    |        |                                                                                                                                                                                                        |
| A_flavus_1041045517014 | 1212683 | KU70-60-8  | INTERGENIC | G      | T    |        |                                                                                                                                                                                                        |
| A_flavus_1041045517014 | 1597961 | KU70-60-8  | INTERGENIC | A      | C    |        |                                                                                                                                                                                                        |
| A_flavus_1041045517027 | 2236635 | KU70-60-8  | INTERGENIC | G      | GTAC |        |                                                                                                                                                                                                        |
| A_flavus_1041045517029 | 1696696 | KU70-60-8  |            | 38244  | G    | T      |                                                                                                                                                                                                        |
| A_flavus_1041045517025 | 2591    | KU70-60-9  |            | 33821  | C    | A      | AFL2T_00001                                                                                                                                                                                            |
| A_flavus_1041045517012 | 1068942 | KU70-60-9  |            | 29111  | C    | A      | AFL2T_01909                                                                                                                                                                                            |
| A_flavus_1041045516891 | 1238100 | KU70-60-9  |            | 25940  | T    | G      | AFL2T_07691                                                                                                                                                                                            |
| A_flavus_1041045517010 | 199448  | KU70-60-9  | INTERGENIC | C      | A    |        |                                                                                                                                                                                                        |
| A_flavus_1041045517010 | 793333  | KU70-60-9  |            | 27664  | C    | T      | AFL2T_08237                                                                                                                                                                                            |
| A_flavus_1041045517022 | 2465    | KU70-60-9  |            | 31809  | C    | G      | AFL2T_11269                                                                                                                                                                                            |
| A_flavus_1041045517022 | 917087  | KU70-60-9  |            | 32143  | A    | AAC    | AFL2T_11603                                                                                                                                                                                            |
| A_flavus_1041045517024 | 1112278 | KU70-60-9  |            | 34007  | C    | A      | AFL2T_00187                                                                                                                                                                                            |
| A_flavus_1041045517025 | 2183583 | KU70-60-10 | INTERGENIC | CT     | C    |        |                                                                                                                                                                                                        |
| A_flavus_1041045517012 | 333348  | KU70-60-10 | INTERGENIC | G      | T    |        |                                                                                                                                                                                                        |
| A_flavus_1041045517014 | 1781398 | KU70-60-10 |            | 30980  | G    | T      | AFL2T_05650                                                                                                                                                                                            |
| A_flavus_1041045516891 | 1758236 | KU70-60-10 |            | 26109  | G    | T      | AFL2T_07860                                                                                                                                                                                            |
| A_flavus_1041045517010 | 1669303 | KU70-60-10 | INTERGENIC | T      | G    |        |                                                                                                                                                                                                        |
| A_flavus_1041045517028 | 1611559 | KU70-60-10 |            | 37557  | G    | C      | AFL2T_08837                                                                                                                                                                                            |
| A_flavus_1041045517011 | 1602947 | KU70-60-10 | INTERGENIC | A      | AGT  |        |                                                                                                                                                                                                        |
|                        |         |            |            |        |      |        | Has domain(s) with predicted protein binding, phosphatidylinositol binding, DNA binding, transcription coactivator activity and role in cell communication, regulation of transcription, DNA-dependent |
|                        |         |            |            |        |      |        | Protein of unknown function                                                                                                                                                                            |
