# Supplementary material for: Genome sequencing of evolved aspergilli populations reveals robust genomes, transversions in A. flavus, and sexual aberrancy in non-homologous end-joining mutants
Source: Springer Nature journal article supplement (doi:10.1186/s12915-019-0702-0), 2019-11-11
Supplement: MOESM6 [file 12915_2019_702_MOESM6_ESM.pdf]

| STRAIN AND CHROMOSOME | POSITION | MA LINE | GENE | REF | ALT | ANOTATION |
|-----------------------|----------|---------|------|-----|-----|-----------|
|-----------------------|----------|---------|------|-----|-----|-----------|

**A. fumigatus WT**

|                         |         |         |            |   |         |                                                                                                                                                                                                                                            |
|-------------------------|---------|---------|------------|---|---------|--------------------------------------------------------------------------------------------------------------------------------------------------------------------------------------------------------------------------------------------|
| Chr_1_A_fumigatus_Af293 | 1906334 | WT60-1  | Afu1g06660 | G | GC      | Protein of unknown function                                                                                                                                                                                                                |
| Chr_2_A_fumigatus_Af293 | 2215206 | WT60-1  | Afu2g08640 | G | A       | Ortholog of A. nidulans FGSC A4 : AN6137, A. niger CBS 513.88 : An12g03990, Aspergillus wentii : Aspwe1_0176126, Aspergillus sydowii : Aspsy1_0058040 and Aspergillus terreus NIH2624 : ATET_09699                                         |
| Chr_1_A_fumigatus_Af293 | 4238270 | WT60-2  | Afu1g15690 | T | G       | Ortholog of A. nidulans FGSC A4 : AN0903, A. niger CBS 513.88 : An01g14030, A. oryzae RIB40 : AO090005001138, Aspergillus wentii : Aspwe1_0027550 and Aspergillus sydowii : Aspsy1_0139000                                                 |
| Chr_1_A_fumigatus_Af293 | 3495339 | WT60-3  | Afu1g13170 | A | G       | Ortholog(s) have role in septation initiation signaling and mitotic spindle pole body localization                                                                                                                                         |
| Chr_2_A_fumigatus_Af293 | 2471087 | WT60-3  | INTERGENIC | A | G       |                                                                                                                                                                                                                                            |
| Chr_2_A_fumigatus_Af293 | 2781396 | WT60-3  | Afu2g10830 | T | C       | Ortholog of Aspergillus fumigatus A1163 : AFUB_026610                                                                                                                                                                                      |
| Chr_4_A_fumigatus_Af293 | 3574910 | WT60-3  | Afu4g13660 | T | C       | Ortholog(s) have drug transmembrane transporter activity, polyamine transmembrane transporter activity and role in ascospore wall assembly, drug transmembrane transport, lipid homeostasis, membrane raft assembly, polyamine homeostasis |
| Chr_6_A_fumigatus_Af293 | 840745  | WT60-3  | Afu6g03820 | C | CCGTGGT | Nascent polypeptide-associated complex subunit alpha; predicted role in 'de novo' cotranslational protein folding; enriched in dormant conidia                                                                                             |
| Chr_3_A_fumigatus_Af293 | 2009857 | WT60-4  | INTERGENIC | G | A       |                                                                                                                                                                                                                                            |
| Chr_6_A_fumigatus_Af293 | 3377779 | WT60-5  | Afu6g13310 | T | C       | Ortholog(s) have role in proteasome regulatory particle assembly and cytosol, nucleus localization                                                                                                                                         |
| Chr_1_A_fumigatus_Af293 | 2324518 | WT60-9  | Afu1g08960 | C | A       | Ortholog of A. nidulans FGSC A4 : AN1383, A. niger CBS 513.88 : An08g00450, A. oryzae RIB40 : AO090005001630, Aspergillus wentii : Aspwe1_0048794 and Aspergillus sydowii : Aspsy1_0025360                                                 |
| Chr_6_A_fumigatus_Af293 | 1720540 | WT60-10 | Afu6g07570 | C | A       | Has domain(s) with predicted zinc ion binding activity                                                                                                                                                                                     |

**A. fumigatus Δku70**

|                         |         |            |            |       |          |                                                                                                                                                                                                        |
|-------------------------|---------|------------|------------|-------|----------|--------------------------------------------------------------------------------------------------------------------------------------------------------------------------------------------------------|
| Chr_2_A_fumigatus_Af293 | 1479836 | KU70-60-1  | INTERGENIC | T     | C        |                                                                                                                                                                                                        |
| Chr_8_A_fumigatus_Af293 | 690852  | KU70-60-1  | INTERGENIC | A     | G        |                                                                                                                                                                                                        |
| Chr_4_A_fumigatus_Af293 | 2718238 | KU70-60-2  | INTERGENIC | C     | CTCATCA  |                                                                                                                                                                                                        |
| Chr_5_A_fumigatus_Af293 | 550266  | KU70-60-2  | Afu5g02160 | AGGGG | A        | Has domain(s) with predicted exonuclease activity, nucleic acid binding, nucleotide binding, zinc ion binding activity and intracellular localization                                                  |
| Chr_6_A_fumigatus_Af293 | 2637054 | KU70-60-3  | Afu6g10660 | G     | GATGCACG | Putative ATP citrate lyase subunit; repressed by gliotoxin exposure22405895                                                                                                                            |
| Chr_1_A_fumigatus_Af293 | 680900  | KU70-60-4  | INTERGENIC | T     | C        |                                                                                                                                                                                                        |
| Chr_3_A_fumigatus_Af293 | 912520  | KU70-60-5  | Afu3g03420 | T     | A        | Fusarinine C non-ribosomal peptide synthetase (NRPS) involved in extracellular siderophore biosynthesis; expression is up-regulated by iron starvation and downregulated under iron-replete conditions |
| Chr_2_A_fumigatus_Af293 | 2102173 | KU70-60-6  | Afu2g08100 | T     | TGTCCTGA | Ortholog of Aspergillus fumigatus A1163 : AFUB_024119                                                                                                                                                  |
| Chr_2_A_fumigatus_Af293 | 3171393 | KU70-60-6  | Afu2g12340 | C     | A        | Has domain(s) with predicted role in meiotic cell cycle                                                                                                                                                |
| Chr_6_A_fumigatus_Af293 | 378799  | KU70-60-6  | Afu6g02170 | A     | G        | Ortholog(s) have ferric-chelate reductase activity, role in copper ion import, iron ion transport and plasma membrane localization                                                                     |
| Chr_6_A_fumigatus_Af293 | 1014987 | KU70-60-6  | Afu6g04440 | A     | G        | Ortholog(s) have role in mitochondrial tRNA wobble uridine modification and mitochondrion localization                                                                                                 |
| Chr_3_A_fumigatus_Af293 | 111746  | KU70-60-7  | Afu3g00510 | G     | A        | Ortholog of Aspergillus fumigatus A1163 : AFUB_047940                                                                                                                                                  |
| Chr_3_A_fumigatus_Af293 | 1619358 | KU70-60-7  | INTERGENIC | A     | ATTC     |                                                                                                                                                                                                        |
| Chr_4_A_fumigatus_Af293 | 3368853 | KU70-60-7  | Afu4g12870 | C     | T        | Putative methylmalonate-semialdehyde dehydrogenase; transcript up-regulated in conidia exposed to neutrophils                                                                                          |
| Chr_6_A_fumigatus_Af293 | 3105415 | KU70-60-7  | Afu6g12340 | C     | T        | Putative GTPase-activating protein; transcript upregulated in response to amphotericin B                                                                                                               |
| Chr_3_A_fumigatus_Af293 | 3242180 | KU70-60-8  | INTERGENIC | CCT   | C        |                                                                                                                                                                                                        |
| Chr_3_A_fumigatus_Af293 | 3242184 | KU70-60-8  | INTERGENIC | A     | AAG      |                                                                                                                                                                                                        |
| Chr_4_A_fumigatus_Af293 | 1130472 | KU70-60-8  | Afu4g04010 | G     | C        | Ortholog(s) have role in fatty acid catabolic process                                                                                                                                                  |
| Chr_6_A_fumigatus_Af293 | 3240470 | KU70-60-8  | INTERGENIC | A     | G        |                                                                                                                                                                                                        |
| Chr_4_A_fumigatus_Af293 | 3667426 | KU70-60-9  | INTERGENIC | G     | A        |                                                                                                                                                                                                        |
| Chr_6_A_fumigatus_Af293 | 851014  | KU70-60-9  | Afu6g03870 | G     | A        | Protein of unknown function; transcript downregulated in response to voriconazole                                                                                                                      |
| Chr_3_A_fumigatus_Af293 | 508823  | KU70-60-10 | Afu3g02070 | C     | T        | Has domain(s) with predicted DNA binding, nucleic acid binding, zinc ion binding activity, role in transcription, DNA-templated and nucleus localization                                               |
| Chr_4_A_fumigatus_Af293 | 2484127 | KU70-60-10 | Afu4g09490 | C     | T        | Ortholog of Aspergillus fumigatus A1163 : AFUB_066610                                                                                                                                                  |
| Chr_7_A_fumigatus_Af293 | 709420  | KU70-60-10 | Afu7g02580 | C     | G        | Predicted DDE1 transposon-related ORF; transcript induced by exposure to human airway epithelial cells                                                                                                 |
| Chr_8_A_fumigatus_Af293 | 678707  | KU70-60-10 | INTERGENIC | TAC   | T        |                                                                                                                                                                                                        |
