# Supplementary material for: Genome sequencing of evolved aspergilli populations reveals robust genomes, transversions in A. flavus, and sexual aberrancy in non-homologous end-joining mutants
Source: Springer Nature journal article supplement (doi:10.1186/s12915-019-0702-0), 2019-11-11
Supplement: MOESM7 [file 12915_2019_702_MOESM7_ESM.pdf]

| STRAIN AND CHROMOSOME                    | POSITION | MA LINE          | GENE       | REF       | ALT        | ANOTATION                                                                                                                                                                                                                                       |
|------------------------------------------|----------|------------------|------------|-----------|------------|-------------------------------------------------------------------------------------------------------------------------------------------------------------------------------------------------------------------------------------------------|
| <b>A. nidulans WT - Asexual MA lines</b> |          |                  |            |           |            |                                                                                                                                                                                                                                                 |
| ChrIV_A_nidulans_FGSC_A4                 | 483735   | ASEXUAL_WT_60_1  | AN7269     | G         | A          | Ortholog(s) have role in fumiquinazoline C biosynthetic process, secondary metabolite biosynthetic process and fungal-type cell wall localization                                                                                               |
| ChrIV_A_nidulans_FGSC_A4                 | 547255   | ASEXUAL_WT_60_1  | AN7248     | T         | A          | Ortholog of A. fumigatus Af293 : Afu2g17200, A. niger CBS 513.88 : An04g09270, A. oryzae RIB40 : AO090102000099, Aspergillus wentii : Aspwe1_0153703 and Aspergillus sydowii : Aspsy1_0140330                                                   |
| ChrIV_A_nidulans_FGSC_A4                 | 1520349  | ASEXUAL_WT_60_1  | INTERGENIC | C         | CT         |                                                                                                                                                                                                                                                 |
| ChrI_A_nidulans_FGSC_A4                  | 1010020  | ASEXUAL_WT_60_1  | INTERGENIC | A         | AAC        |                                                                                                                                                                                                                                                 |
| ChrVIII_A_nidulans_FGSC_A4               | 2169263  | ASEXUAL_WT_60_1  | INTERGENIC | C         | CA         |                                                                                                                                                                                                                                                 |
| ChrVII_A_nidulans_FGSC_A4                | 3059130  | ASEXUAL_WT_60_1  | AN2157     | A         | G          | Putative aspartic endopeptidase                                                                                                                                                                                                                 |
| ChrV_A_nidulans_FGSC_A4                  | 1392706  | ASEXUAL_WT_60_1  | AN5173     | T         | TTG        | Has domain(s) with predicted hydrolase activity                                                                                                                                                                                                 |
| ChrVIII_A_nidulans_FGSC_A4               | 2155552  | ASEXUAL_WT_60_2  | AN0890     | A         | G          | Ortholog(s) have fungal-type vacuole membrane localization                                                                                                                                                                                      |
| ChrVIII_A_nidulans_FGSC_A4               | 4010892  | ASEXUAL_WT_60_2  | INTERGENIC | CTGGTAGG  | C          |                                                                                                                                                                                                                                                 |
| ChrIII_A_nidulans_FGSC_A4                | 1010863  | ASEXUAL_WT_60_3  | AN4783     | G         | T          | Subunit 2 of the COP9 signalosome; required for formation of cleistothecia; mutants produce aberrant red color within distinct hyphae                                                                                                           |
| ChrIV_A_nidulans_FGSC_A4                 | 341689   | ASEXUAL_WT_60_3  | AN7311     | C         | T          | Ortholog of A. fumigatus Af293 : Afu2g16670, A. niger CBS 513.88 : An04g08690, A. oryzae RIB40 : AO090102000156, Aspergillus wentii : Aspwe1_0039317 and Aspergillus sydowii : Aspsy1_0027138                                                   |
| ChrVII_A_nidulans_FGSC_A4                | 1960358  | ASEXUAL_WT_60_3  | AN1810     | C         | T          | Ornithine transaminase, involved in utilization of arginine as a proline source; arginine-induced expression and activity; subject to carbon-catabolite and nitrogen-metabolite repression; regulated by CreA and AreA; stress-induced protein  |
| ChrVI_A_nidulans_FGSC_A4                 | 312083   | ASEXUAL_WT_60_3  | INTERGENIC | C         | G          |                                                                                                                                                                                                                                                 |
| ChrVI_A_nidulans_FGSC_A4                 | 1747837  | ASEXUAL_WT_60_3  | INTERGENIC | G         | A          |                                                                                                                                                                                                                                                 |
| ChrIII_A_nidulans_FGSC_A4                | 1151464  | ASEXUAL_WT_60_5  | AN4733     | G         | GGTT       | Ortholog(s) have role in signal transduction and plasma membrane localization                                                                                                                                                                   |
| ChrII_A_nidulans_FGSC_A4                 | 182082   | ASEXUAL_WT_60_5  | INTERGENIC | G         | A          |                                                                                                                                                                                                                                                 |
| ChrII_A_nidulans_FGSC_A4                 | 992968   | ASEXUAL_WT_60_5  | AN8168     | C         | T          | Regulatory protein involved in nitrogen metabolite repression                                                                                                                                                                                   |
| ChrII_A_nidulans_FGSC_A4                 | 2977222  | ASEXUAL_WT_60_5  | AN3814     | CCTTCT    | C          | Putative peptidyl-prolyl cis-trans isomerase (PPIase); cyclophilin                                                                                                                                                                              |
| ChrVIII_A_nidulans_FGSC_A4               | 219652   | ASEXUAL_WT_60_5  | INTERGENIC | AT        | A          |                                                                                                                                                                                                                                                 |
| ChrVIII_A_nidulans_FGSC_A4               | 766114   | ASEXUAL_WT_60_5  | INTERGENIC | G         | A          |                                                                                                                                                                                                                                                 |
| ChrVIII_A_nidulans_FGSC_A4               | 2996437  | ASEXUAL_WT_60_5  | AN0609     | C         | T          | Triacetylflusarinine C (TAFc) biosynthetic enoyl-CoA hydratase; siderophore biosynthetic enzyme                                                                                                                                                 |
| ChrVI_A_nidulans_FGSC_A4                 | 977075   | ASEXUAL_WT_60_5  | INTERGENIC | G         | GCCAAGGAAT |                                                                                                                                                                                                                                                 |
| ChrV_A_nidulans_FGSC_A4                  | 552192   | ASEXUAL_WT_60_5  | INTERGENIC | T         | C          |                                                                                                                                                                                                                                                 |
| ChrIII_A_nidulans_FGSC_A4                | 2574750  | ASEXUAL_WT_60_6  | AN8860     | G         | A          | Ortholog(s) have ATP binding, ATPase activity, adenylate kinase activity                                                                                                                                                                        |
| ChrII_A_nidulans_FGSC_A4                 | 3185314  | ASEXUAL_WT_60_6  | AN3750     | C         | A          | Ortholog of A. fumigatus Af293 : Afu7g04470, A. niger CBS 513.88 : An13g01050, A. oryzae RIB40 : AO090005000133, Aspergillus wentii : Aspwe1_0038525 and Aspergillus sydowii : Aspsy1_0088662                                                   |
| ChrI_A_nidulans_FGSC_A4                  | 128344   | ASEXUAL_WT_60_6  | AN6452     | C         | G          | Ortholog(s) have oligopeptide transmembrane transporter activity and role in transmembrane transport                                                                                                                                            |
| ChrI_A_nidulans_FGSC_A4                  | 3519129  | ASEXUAL_WT_60_6  | AN6901     | G         | C          | Protein required for wild-type mitochondrial morphology and intracellular mitochondrial distribution; localized to mitochondrial membranes; 4 transmembrane motifs; similar to S. cerevisiae Mdm10p                                             |
| ChrVIII_A_nidulans_FGSC_A4               | 2455893  | ASEXUAL_WT_60_6  | AN0795     | C         | T          | Ortholog of A. fumigatus Af293 : Afu1g14590, A. niger CBS 513.88 : An01g12590, Neosartorya fischeri NRRL 181 : NFIA_010830, Aspergillus wentii : Aspwe1_0027661 and Aspergillus versicolor : Aspve1_0121944                                     |
| ChrIII_A_nidulans_FGSC_A4                | 1061875  | ASEXUAL_WT_60_8  | AN4766     | CGCATCTGC | C          | Ortholog of A. fumigatus Af293 : Afu3g06495, A. niger CBS 513.88 : An11g09830, Aspergillus wentii : Aspwe1_0029358, Aspergillus sydowii : Aspsy1_0087849 and Aspergillus terreus NIH2624 : ATET_08768                                           |
| ChrIV_A_nidulans_FGSC_A4                 | 1708284  | ASEXUAL_WT_60_8  | INTERGENIC | G         | GTGTTGT    |                                                                                                                                                                                                                                                 |
| ChrIV_A_nidulans_FGSC_A4                 | 2478363  | ASEXUAL_WT_60_8  | AN7721     | T         | C          | Putative translocon, alpha subunit; ortholog of S. cerevisiae Sec61p                                                                                                                                                                            |
| ChrVIII_A_nidulans_FGSC_A4               | 1493647  | ASEXUAL_WT_60_8  | AN1104     | C         | A          | Ortholog(s) have ADP binding, peptidase activity, role in protein targeting to mitochondrion and mitochondrial processing peptidase complex localization                                                                                        |
| ChrVI_A_nidulans_FGSC_A4                 | 1436309  | ASEXUAL_WT_60_8  | INTERGENIC | TGGGGGGG  | T          |                                                                                                                                                                                                                                                 |
| ChrVI_A_nidulans_FGSC_A4                 | 1659321  | ASEXUAL_WT_60_8  | INTERGENIC | GC        | G          |                                                                                                                                                                                                                                                 |
| ChrIII_A_nidulans_FGSC_A4                | 259683   | ASEXUAL_WT_60_10 | AN5021     | G         | T          | Ortholog(s) have role in conidium formation, regulation of growth rate                                                                                                                                                                          |
| ChrII_A_nidulans_FGSC_A4                 | 3411660  | ASEXUAL_WT_60_10 | INTERGENIC | T         | TGGAAAGGAG |                                                                                                                                                                                                                                                 |
| ChrVIII_A_nidulans_FGSC_A4               | 2625099  | ASEXUAL_WT_60_10 | INTERGENIC | G         | A          |                                                                                                                                                                                                                                                 |
| ChrVIII_A_nidulans_FGSC_A4               | 2921590  | ASEXUAL_WT_60_10 | AN0640     | G         | T          | Protein with a role in sphingoglycolipid metabolism; required for phytosphingosine biosynthesis; depletion causes cell wall thickening, reduced asexual development, increased sexual development, increased levels of ppoA and steA transcript |
| ChrVIII_A_nidulans_FGSC_A4               | 4035404  | ASEXUAL_WT_60_10 | AN0283     | AGAG      | A          | Protein of unknown function                                                                                                                                                                                                                     |
| ChrVIII_A_nidulans_FGSC_A4               | 4804512  | ASEXUAL_WT_60_10 | INTERGENIC | C         | T          |                                                                                                                                                                                                                                                 |
| ChrVII_A_nidulans_FGSC_A4                | 3651303  | ASEXUAL_WT_60_10 | INTERGENIC | G         | A          |                                                                                                                                                                                                                                                 |
| ChrIII_A_nidulans_FGSC_A4                | 75776    | ASEXUAL_WT_60_4  | INTERGENIC | C         | T          |                                                                                                                                                                                                                                                 |
| ChrI_A_nidulans_FGSC_A4                  | 1414631  | ASEXUAL_WT_60_4  | AN12016    | A         | AC         | Protein of unknown function                                                                                                                                                                                                                     |
| ChrVIII_A_nidulans_FGSC_A4               | 1328152  | ASEXUAL_WT_60_4  | INTERGENIC | G         | GA         |                                                                                                                                                                                                                                                 |
| ChrIV_A_nidulans_FGSC_A4                 | 1112300  | ASEXUAL_WT_60_9  | INTERGENIC | T         | G          |                                                                                                                                                                                                                                                 |
| ChrVIII_A_nidulans_FGSC_A4               | 87223    | ASEXUAL_WT_60_7  | AN9259     | C         | T          | Predicted prenyltransferase; required for austinol and dehydroaustinol biosynthesis; aus secondary metabolism gene cluster member                                                                                                               |
| ChrVIII_A_nidulans_FGSC_A4               | 3031041  | ASEXUAL_WT_60_7  | INTERGENIC | A         | AT         |                                                                                                                                                                                                                                                 |

|                            |         |                 |        |   |   |                                                                                                                                                                                                                                    |
|----------------------------|---------|-----------------|--------|---|---|------------------------------------------------------------------------------------------------------------------------------------------------------------------------------------------------------------------------------------|
| ChrVIII_A_nidulans_FGSC_A4 | 3438253 | ASEXUAL_WT_60_7 | AN0477 | G | A | Has domain(s) with predicted homogentisate 1,2-dioxygenase activity and role in L-phenylalanine catabolic process, oxidation-reduction process, tyrosine metabolic process                                                         |
| ChrVIII_A_nidulans_FGSC_A4 | 4331060 | ASEXUAL_WT_60_7 | AN0191 | C | G | Ortholog(s) have ATPase activity, tRNA binding activity and role in regulation of cytoplasmic translational fidelity, regulation of transcription by RNA polymerase II, tRNA wobble base 5-methoxycarbonylmethyl-2-thiouridylation |
| ChrVII_A_nidulans_FGSC_A4  | 2072100 | ASEXUAL_WT_60_7 | AN1854 | C | T | Putative inositol pentakisphosphate 2-kinase; locus contains the conserved upstream open reading frame (uORF) AN1854-uORF                                                                                                          |

#### A. nidulans Δku70 - Asexual MA lines

|                            |         |                    |            |      |                   |                                                                                                                                                                                                                                                  |
|----------------------------|---------|--------------------|------------|------|-------------------|--------------------------------------------------------------------------------------------------------------------------------------------------------------------------------------------------------------------------------------------------|
| ChrII_A_nidulans_FGSC_A4   | 439614  | ASEXUAL_KU70_60_1  | INTERGENIC | G    | GT                |                                                                                                                                                                                                                                                  |
| ChrII_A_nidulans_FGSC_A4   | 1909882 | ASEXUAL_KU70_60_1  | INTERGENIC | C    | T                 |                                                                                                                                                                                                                                                  |
| ChrII_A_nidulans_FGSC_A4   | 2446569 | ASEXUAL_KU70_60_1  | AN10502    | G    | T                 | Has domain(s) with predicted catalytic activity, hydrolase activity, hydrolyzing O-glycosyl compounds activity and role in carbohydrate metabolic process                                                                                        |
| ChrII_A_nidulans_FGSC_A4   | 3438377 | ASEXUAL_KU70_60_1  | INTERGENIC | C    | T                 |                                                                                                                                                                                                                                                  |
| ChrI_A_nidulans_FGSC_A4    | 2943315 | ASEXUAL_KU70_60_1  | AN6712     | C    | A                 | Putative phospholipase D; expression upregulated after exposure to farnesol                                                                                                                                                                      |
| ChrVIII_A_nidulans_FGSC_A4 | 524147  | ASEXUAL_KU70_60_1  | AN9402     | T    | G                 | Has domain(s) with predicted hydrolase activity and role in nucleotide catabolic process                                                                                                                                                         |
| ChrVIII_A_nidulans_FGSC_A4 | 3212384 | ASEXUAL_KU70_60_1  | AN0549     | C    | A                 | Putative chitinase; glycoside hydrolase family 18 (GH18) protein with a predicted role in chitin hydrolysis                                                                                                                                      |
| ChrVII_A_nidulans_FGSC_A4  | 43723   | ASEXUAL_KU70_60_1  | AN9047     | G    | T                 | Has domain(s) with predicted DNA binding, RNA polymerase II transcription factor activity, sequence-specific DNA binding, zinc ion binding activity and role in regulation of transcription, DNA-templated, transcription, DNA-templated         |
| ChrVII_A_nidulans_FGSC_A4  | 4395435 | ASEXUAL_KU70_60_1  | INTERGENIC | G    | A                 |                                                                                                                                                                                                                                                  |
| ChrVI_A_nidulans_FGSC_A4   | 1174429 | ASEXUAL_KU70_60_1  | AN3307     | C    | T                 | Catalytic subunit of the major alpha-1,3 glucan synthase complex; mutants grow as dispersed hyphae in liquid culture                                                                                                                             |
| ChrVI_A_nidulans_FGSC_A4   | 2423143 | ASEXUAL_KU70_60_1  | INTERGENIC | C    | A                 |                                                                                                                                                                                                                                                  |
| ChrII_A_nidulans_FGSC_A4   | 3069809 | ASEXUAL_KU70_60_2  | AN3783     | G    | T                 | Protein of unknown function                                                                                                                                                                                                                      |
| ChrIV_A_nidulans_FGSC_A4   | 64187   | ASEXUAL_KU70_60_2  | AN7402     | G    | T                 | Putative glucoamylase with a predicted role in starch metabolism                                                                                                                                                                                 |
| ChrI_A_nidulans_FGSC_A4    | 175610  | ASEXUAL_KU70_60_2  | AN6439     | A    | G                 | Ortholog(s) have intracellular localization                                                                                                                                                                                                      |
| ChrVIII_A_nidulans_FGSC_A4 | 1158569 | ASEXUAL_KU70_60_2  | INTERGENIC | A    | G                 |                                                                                                                                                                                                                                                  |
| ChrVIII_A_nidulans_FGSC_A4 | 4459842 | ASEXUAL_KU70_60_2  | AN10021    | C    | T                 | Regulatory protein; member of the monodictyphenone secondary metabolite biosynthesis gene cluster; similar to aflatoxin coactivator aflJ and O-methyltransferases; required for biosynthesis of monodictyphenone, a prenyl xanthone precursor    |
| ChrVII_A_nidulans_FGSC_A4  | 3184055 | ASEXUAL_KU70_60_2  | INTERGENIC | C    | CA                |                                                                                                                                                                                                                                                  |
| ChrIII_A_nidulans_FGSC_A4  | 145032  | ASEXUAL_KU70_60_6  | INTERGENIC | A    | G                 |                                                                                                                                                                                                                                                  |
| ChrIV_A_nidulans_FGSC_A4   | 122691  | ASEXUAL_KU70_60_6  | INTERGENIC | T    | A                 |                                                                                                                                                                                                                                                  |
| ChrIV_A_nidulans_FGSC_A4   | 2801413 | ASEXUAL_KU70_60_6  | INTERGENIC | C    | G                 |                                                                                                                                                                                                                                                  |
| ChrIV_A_nidulans_FGSC_A4   | 2801416 | ASEXUAL_KU70_60_6  | INTERGENIC | C    | G                 |                                                                                                                                                                                                                                                  |
| ChrVIII_A_nidulans_FGSC_A4 | 4448922 | ASEXUAL_KU70_60_6  | AN0150     | G    | A                 | Polyketide synthase; member of the monodictyphenone secondary metabolite biosynthesis gene cluster; required for the synthesis of the xanthenes (shamixanthone and epishamixanthone), emodin, arugosins, monodictyphenone, and related compounds |
| ChrVI_A_nidulans_FGSC_A4   | 3147687 | ASEXUAL_KU70_60_6  | AN2686     | C    | T                 | Has domain(s) with predicted role in mitotic spindle organization and DASH complex, mitotic spindle localization                                                                                                                                 |
| ChrV_A_nidulans_FGSC_A4    | 2862607 | ASEXUAL_KU70_60_6  | INTERGENIC | T    | TA                |                                                                                                                                                                                                                                                  |
| ChrIII_A_nidulans_FGSC_A4  | 1900834 | ASEXUAL_KU70_60_7  | AN4483     | C    | A                 | Predicted protein serine/threonine kinase, part of HogA mitogen-activated protein kinase (MAPK) signaling pathway, involved in regulation of stress response and development                                                                     |
| ChrII_A_nidulans_FGSC_A4   | 3019588 | ASEXUAL_KU70_60_7  | AN3797     | C    | G                 | Ortholog(s) have role in cellular response to UV, double-strand break repair via homologous recombination, postreplication repair                                                                                                                |
| ChrI_A_nidulans_FGSC_A4    | 2384215 | ASEXUAL_KU70_60_7  | INTERGENIC | GTTT | G                 |                                                                                                                                                                                                                                                  |
| ChrVI_A_nidulans_FGSC_A4   | 2044416 | ASEXUAL_KU70_60_7  | INTERGENIC | T    | G                 |                                                                                                                                                                                                                                                  |
| ChrII_A_nidulans_FGSC_A4   | 250784  | ASEXUAL_KU70_60_9  | INTERGENIC | C    | T                 |                                                                                                                                                                                                                                                  |
| ChrVII_A_nidulans_FGSC_A4  | 2508300 | ASEXUAL_KU70_60_9  | INTERGENIC | T    | G                 |                                                                                                                                                                                                                                                  |
| ChrVII_A_nidulans_FGSC_A4  | 3649095 | ASEXUAL_KU70_60_9  | AN2349     | C    | A                 | Putative ATP-binding cassette (ABC) transporter of the P-glycoprotein cluster                                                                                                                                                                    |
| ChrVI_A_nidulans_FGSC_A4   | 2713410 | ASEXUAL_KU70_60_9  | AN2818     | A    | G                 | Ortholog of A. niger CBS 513.88 : An12g03370, An18g00460, An07g00580, A. oryzae RIB40 : AO090103000478, Aspergillus wentii : Aspwe1_0058229, Aspwe1_0111514 and Aspergillus versicolor : Aspve1_0051884                                          |
| ChrV_A_nidulans_FGSC_A4    | 333035  | ASEXUAL_KU70_60_9  | AN8388     | T    | TA                | Has domain(s) with predicted catalytic activity and role in nucleoside metabolic process                                                                                                                                                         |
| ChrIII_A_nidulans_FGSC_A4  | 619577  | ASEXUAL_KU70_60_10 | AN4900     | C    | A                 | Putative bZIP DNA-binding protein involved in regulating nitrogen metabolite repression                                                                                                                                                          |
| ChrIII_A_nidulans_FGSC_A4  | 840657  | ASEXUAL_KU70_60_10 | AN4835     | G    | A                 | Has domain(s) with predicted role in cell division, centromere complex assembly, chromosome segregation and kinetochore, nucleus localization                                                                                                    |
| ChrIII_A_nidulans_FGSC_A4  | 2321136 | ASEXUAL_KU70_60_10 | AN4349     | T    | C                 | Ortholog of A. fumigatus Af293 : Afu4g06480, A. niger CBS 513.88 : An04g00800, A. oryzae RIB40 : AO090023000945, Aspergillus wentii : Aspwe1_0100642 and Aspergillus sydowii : Aspsy1_0163308                                                    |
| ChrIII_A_nidulans_FGSC_A4  | 3421031 | ASEXUAL_KU70_60_10 | INTERGENIC | G    | C                 |                                                                                                                                                                                                                                                  |
| ChrII_A_nidulans_FGSC_A4   | 1789495 | ASEXUAL_KU70_60_10 | INTERGENIC | G    | C                 |                                                                                                                                                                                                                                                  |
| ChrIV_A_nidulans_FGSC_A4   | 2756239 | ASEXUAL_KU70_60_10 | AN7814     | G    | A                 | Putative polyketide synthase/fatty acid synthase beta; required for sterigmatocystin biosynthesis; member of the sterigmatocystin biosynthesis gene cluster                                                                                      |
| ChrVIII_A_nidulans_FGSC_A4 | 3612368 | ASEXUAL_KU70_60_10 | INTERGENIC | T    | A                 |                                                                                                                                                                                                                                                  |
| ChrVI_A_nidulans_FGSC_A4   | 117320  | ASEXUAL_KU70_60_10 | INTERGENIC | G    | GTATACCTGCCTACAAC |                                                                                                                                                                                                                                                  |
| ChrVI_A_nidulans_FGSC_A4   | 1828305 | ASEXUAL_KU70_60_10 | INTERGENIC | A    | G                 |                                                                                                                                                                                                                                                  |
| ChrIII_A_nidulans_FGSC_A4  | 982379  | ASEXUAL_KU70_60_3  | INTERGENIC | C    | T                 |                                                                                                                                                                                                                                                  |
| ChrI_A_nidulans_FGSC_A4    | 736551  | ASEXUAL_KU70_60_3  | INTERGENIC | T    | TTG               |                                                                                                                                                                                                                                                  |
| ChrI_A_nidulans_FGSC_A4    | 1991031 | ASEXUAL_KU70_60_3  | INTERGENIC | A    | G                 |                                                                                                                                                                                                                                                  |

|                            |         |                   |            |   |             |                                                                                                                                                                                                                            |
|----------------------------|---------|-------------------|------------|---|-------------|----------------------------------------------------------------------------------------------------------------------------------------------------------------------------------------------------------------------------|
| ChrVIII_A_nidulans_FGSC_A4 | 1389464 | ASEXUAL_KU70_60_3 | INTERGENIC | C | CTTTTTTCT   |                                                                                                                                                                                                                            |
| ChrVII_A_nidulans_FGSC_A4  | 930902  | ASEXUAL_KU70_60_3 | AN10195    | C | T           | Ortholog(s) have valine-tRNA ligase activity                                                                                                                                                                               |
| ChrII_A_nidulans_FGSC_A4   | 674085  | ASEXUAL_KU70_60_5 | AN8076     | G | GCAC        | Predicted DNA binding protein; locus contains the conserved upstream open reading frame (uORF) AN8076-uORF                                                                                                                 |
| ChrVI_A_nidulans_FGSC_A4   | 9979    | ASEXUAL_KU70_60_5 | AN9233     | G | T           | Predicted O-methyltransferase; member of a dimethyl-allyl-tryptophan synthase (DMATS) type aromatic prenyltransferase- and NRPS-containing gene cluster                                                                    |
| ChrVI_A_nidulans_FGSC_A4   | 2865880 | ASEXUAL_KU70_60_5 | AN10340    | G | C           | Ortholog(s) have di-trans,poly-cis-decaprenylcistransferase activity, trans-hexaprenyltranstransferase activity and role in farnesyl diphosphate biosynthetic process, mevalonate pathway, ubiquinone biosynthetic process |
| ChrVII_A_nidulans_FGSC_A4  | 3216198 | ASEXUAL_KU70_60_8 | INTERGENIC | T | TGCCTCACT   |                                                                                                                                                                                                                            |
| ChrVII_A_nidulans_FGSC_A4  | 3287940 | ASEXUAL_KU70_60_8 | INTERGENIC | C | CTCTTTTCTTT |                                                                                                                                                                                                                            |
| ChrVII_A_nidulans_FGSC_A4  | 3287957 | ASEXUAL_KU70_60_8 | INTERGENIC | T | C           |                                                                                                                                                                                                                            |
| ChrVI_A_nidulans_FGSC_A4   | 2200530 | ASEXUAL_KU70_60_8 | INTERGENIC | A | G           |                                                                                                                                                                                                                            |
