# Supplementary material for: Genome sequencing of evolved aspergilli populations reveals robust genomes, transversions in A. flavus, and sexual aberrancy in non-homologous end-joining mutants
Source: Springer Nature journal article supplement (doi:10.1186/s12915-019-0702-0), 2019-11-11
Supplement: MOESM8 [file 12915_2019_702_MOESM8_ESM.pdf]

| STRAIN AND CHROMOSOME                                         | POSITION | MA LINE         | GENE       | REF | ALT  | ANOTATION                                                                                                                                                                                                                             |
|---------------------------------------------------------------|----------|-----------------|------------|-----|------|---------------------------------------------------------------------------------------------------------------------------------------------------------------------------------------------------------------------------------------|
| <b>A. nidulans WT - Sexual MA lines</b>                       |          |                 |            |     |      |                                                                                                                                                                                                                                       |
| ChrIII_A_nidulans_FGSC_A4                                     | 3260650  | SEXUAL_WT_5_1   | INTERGENIC | A   | T    |                                                                                                                                                                                                                                       |
| ChrI_A_nidulans_FGSC_A4                                       | 1296224  | SEXUAL_WT_5_2   | AN6089     | G   | C    | Putative 60 kilodalton heat shock protein                                                                                                                                                                                             |
| ChrVII_A_nidulans_FGSC_A4                                     | 3174103  | SEXUAL_WT_5_2   | INTERGENIC | C   | CT   |                                                                                                                                                                                                                                       |
| ChrIV_A_nidulans_FGSC_A4                                      | 1124655  | SEXUAL_WT_5_3   | AN7071     | T   | C    | Putative polyketide synthase; involved in the production of alternariol and other secondary metabolites; predicted backbone enzyme of a secondary metabolism gene cluster                                                             |
| ChrVIII_A_nidulans_FGSC_A4                                    | 4403705  | SEXUAL_WT_5_9   | AN0165     | G   | GGAA | Ortholog(s) have role in Golgi to vacuole transport, protein targeting to vacuole and AP-3 adaptor complex localization                                                                                                               |
| <b>A. nidulans <math>\Delta ku70</math> - Sexual MA lines</b> |          |                 |            |     |      |                                                                                                                                                                                                                                       |
| ChrII_A_nidulans_FGSC_A4                                      | 112335   | SEXUAL_KU70_5_2 | AN11028    | G   | A    | Predicted nucleotide binding protein with oxidoreductase activity and a role in oxidation-reduction; predicted secondary metabolism gene cluster member                                                                               |
| ChrVI_A_nidulans_FGSC_A4                                      | 1706688  | SEXUAL_KU70_5_2 | AN3140     | C   | A    | Ortholog of A. niger CBS 513.88 : An02g08990, A. oryzae RIB40 : AO090012000820, Aspergillus wentii : Aspwe1_0050036, Aspergillus sydowii : Aspsy1_1171750 and Aspergillus terreus NIH2624 : ATET_04095                                |
| ChrVIII_A_nidulans_FGSC_A4                                    | 66722    | SEXUAL_KU70_5_3 | INTERGENIC | C   | T    |                                                                                                                                                                                                                                       |
| ChrVII_A_nidulans_FGSC_A4                                     | 1550386  | SEXUAL_KU70_5_3 | INTERGENIC | C   | T    |                                                                                                                                                                                                                                       |
| ChrVI_A_nidulans_FGSC_A4                                      | 1072246  | SEXUAL_KU70_5_3 | AN3333     | T   | C    | Has domain(s) with predicted oxidoreductase activity                                                                                                                                                                                  |
| ChrVI_A_nidulans_FGSC_A4                                      | 3339468  | SEXUAL_KU70_5_3 | INTERGENIC | T   | A    |                                                                                                                                                                                                                                       |
| ChrIII_A_nidulans_FGSC_A4                                     | 2316317  | SEXUAL_KU70_5_5 | AN10544    | G   | A    | Has domain(s) with predicted 3-dehydroquinate dehydratase activity, catalytic activity                                                                                                                                                |
| ChrIV_A_nidulans_FGSC_A4                                      | 894117   | SEXUAL_KU70_5_5 | AN10900    | C   | A    | Has domain(s) with predicted serine-type peptidase activity and role in proteolysis                                                                                                                                                   |
| ChrIV_A_nidulans_FGSC_A4                                      | 1643084  | SEXUAL_KU70_5_5 | AN7472     | T   | C    | Ortholog(s) have dolichyl-diphosphooligosaccharide-protein glycotransferase activity, role in protein N-linked glycosylation via asparagine and oligosaccharyltransferase complex, plasma membrane localization                       |
| ChrI_A_nidulans_FGSC_A4                                       | 2302489  | SEXUAL_KU70_5_5 | INTERGENIC | A   | G    |                                                                                                                                                                                                                                       |
| ChrV_A_nidulans_FGSC_A4                                       | 2696819  | SEXUAL_KU70_5_5 | INTERGENIC | C   | T    |                                                                                                                                                                                                                                       |
| ChrV_A_nidulans_FGSC_A4                                       | 2696901  | SEXUAL_KU70_5_5 | INTERGENIC | T   | C    |                                                                                                                                                                                                                                       |
| ChrVII_A_nidulans_FGSC_A4                                     | 3475139  | SEXUAL_KU70_5_7 | AN2296     | T   | C    | Ortholog(s) have transcriptional activator activity, RNA polymerase II proximal promoter sequence-specific DNA binding activity, role in positive regulation of transcription by RNA polymerase II and nuclear chromatin localization |
| ChrII_A_nidulans_FGSC_A4                                      | 7382     | SEXUAL_KU70_5_8 | AN7850     | C   | A    | Ortholog of A. fumigatus Af293 : Afu4g14030, A. oryzae RIB40 : AO090001000391, Neosartorya fischeri NRRL 181 : NFIA_102290, Aspergillus wentii : Aspwe1_0046564 and Aspergillus terreus NIH2624 : ATET_02187                          |
| ChrVIII_A_nidulans_FGSC_A4                                    | 3910347  | SEXUAL_KU70_5_8 | INTERGENIC | C   | T    |                                                                                                                                                                                                                                       |
